# Supplementary material
Source: Springer Nature journal article supplement (https://www.springermedizin.de/resource/supplementary/13054_2014_2474_MOESM6_ESM.pdf/9714182)
Supplement: MOESM6 [file 9714182]

**Table 4 Principal respiratory parameter outcomes in non-randomised studies**

| Study                                 | Time     | PaCO <sub>2</sub> Reduction<br>(mmHg) | PaO <sub>2</sub> /FiO <sub>2</sub> Increase<br>(mmHg) | Pplat <sup>a</sup> Reduction<br>(mmHg) | V <sub>t</sub> <sup>c</sup> Reduction | pH Increase            |
|---------------------------------------|----------|---------------------------------------|-------------------------------------------------------|----------------------------------------|---------------------------------------|------------------------|
| Neirhaus A et al. <sup>28</sup>       | Day 1    | 80.0 +/- 23.0                         | 100.0 +/-28.9                                         | 34.0 +/-3.0 <sup>b</sup>               | 292.5 +/-94.0 <sup>d</sup>            | 7.18 +/-0.22           |
|                                       |          | to<br>54.0 +/- 19.0                   | to<br>120.7 +/- 51.2                                  | to<br>28.3 +/-4.0                      | to<br>183.0 +/- 67.0                  | to<br>7.37 +/- 0.09    |
| Weber-Carstens S et al. <sup>25</sup> | NR       | 120 (81.9-152.5)                      | 121.5 (79.3-178.3)                                    | 39 (34.8-43.3)                         | 5.2 (4.4-5.9)                         | 7.06 (6.9-7.3)         |
|                                       |          | to<br>60.3 (52.5-69)                  | to<br>87 (73-139.3)                                   | to<br>31.5 (28.8-33.5)                 | to<br>3.5 (3.1-4.3) <sup>e</sup>      | to<br>7.38 (7.18-7.48) |
| Zimmermann M et al. <sup>20</sup>     | 24 hours | 73 (61-86)                            | 75 (62-130)                                           | 35 (31-38)                             | 6.6 (5.3-7.2)                         | 7.23 (7.16-7.30)       |
|                                       |          | to<br>41 (34-48)                      | to<br>110 (86-160)                                    | to<br>30 (26-34)                       | to<br>4.4 (3.4-5.4) <sup>e</sup>      | to<br>7.44 (7.37-7.45) |
| Terragni PP et al. <sup>21</sup>      | NR       | 47.2 ± 8.6                            | NR                                                    | NR                                     | NR                                    | 7.20 ± 0.02            |
|                                       |          | to<br>73.6 ± 11.1                     |                                                       |                                        |                                       | to<br>7.38 ± 0.04      |
| Muellenbach RM et al. <sup>26</sup>   | 12 hours | 65.26 (54-72)                         | 61.6 (47.3-85.6)                                      | NR                                     | 450 (400-542.5)                       | 7.25 (7.22-7.29)       |
|                                       |          | to<br>39.8 (36-42)                    | to<br>135.8 (87.8-153)                                |                                        | to<br>200 (145-250) <sup>d</sup>      | to<br>7.4 (7.37-7.42)  |
| Bein T et al. <sup>27</sup>           | 24 hours | 60 (48-80)                            | 58 (47-78)                                            | NR                                     | 430 (360-540)                         | 7.27 (7.18-7.36)       |
|                                       |          | to<br>34 (30-39)                      | to<br>107 (74-142)                                    |                                        | to<br>380 (320-470) <sup>d</sup>      | to<br>7.45 (7.41-7.50) |
| Liebold A et al. <sup>29</sup>        | 24 hours | 59 ± 17                               | 50                                                    | NR                                     | NR                                    | NR                     |
|                                       |          | to<br>32 ± 8                          | to<br>110                                             |                                        |                                       |                        |
| Guinard N et al. <sup>22</sup>        | NR       | NR                                    | NR                                                    | NR                                     | NR                                    | NR                     |
| Brunet F et al. <sup>23</sup>         | NR       | 66 ± 25                               | 79 ± 21                                               | 48 ± 10                                | 622 ± 131                             | NR                     |
|                                       |          | to<br>43 ± 6                          | to<br>207 ± 108                                       | to<br>37 ± 5                           | to<br>270 ± 60 <sup>b</sup>           |                        |
| Bindslev et al. <sup>30</sup>         | NR       | NR                                    | NR                                                    | NR                                     | NR                                    | NR                     |
| Gattinoni L et al. <sup>24</sup>      | NR       | NR                                    | NR                                                    | NR                                     | NR                                    | NR                     |

<sup>a</sup> Pplat = plateau pressure <sup>b</sup> P<sub>insp</sub> = Inspiratory pressure, <sup>c</sup> tidal volume <sup>d</sup> units are ml, <sup>e</sup> units are ml/Kg, NR = not recorded

Where in brackets expressed as median (IQR), remainder expressed as mean ± SD
